# Supplementary material for: Development and Initial Evaluation of the Web-Based Self-Management Program “Partner in Balance” for Family Caregivers of People With Early Stage Dementia: An Exploratory Mixed-Methods Study
Source: PubMed Central journal article supplement (PMC4795319; doi:10.2196/resprot.5142), 2016-03-01
Supplement: resprot_v5i1e33_app1.pdf [file resprot_v5i1e33_app1.pdf]

## Program Participation Questionnaire

| Rate each item on a scale from 1 (strongly disagree) to 7 (strongly agree)                                            | Please elaborate your item score                                                                                                                                            |
|-----------------------------------------------------------------------------------------------------------------------|-----------------------------------------------------------------------------------------------------------------------------------------------------------------------------|
| 1. It was convenient to follow the program online                                                                     | - <i>What made it (not) convenient?</i>                                                                                                                                     |
| 2. The website was easy to use                                                                                        | - <i>What was specifically easy/difficult?</i>                                                                                                                              |
| 3. I was able to read the texts perfectly                                                                             | - <i>Comments on font, size, contrast?</i>                                                                                                                                  |
| 4. The website indications were clear to me                                                                           | - <i>Why were they (not) clear?</i><br><br>- <i>Points for improvement?</i>                                                                                                 |
| 5. The amount of information presented was good                                                                       | - <i>Video clip length, amount of text</i>                                                                                                                                  |
| 6. The content of the modules was clear                                                                               | - <i>Comprehensible?</i><br><br>- <i>Points for improvements?</i>                                                                                                           |
| 7. I was satisfied with the amount of time I spent per module                                                         | - <i>How much time did you spent per module?</i><br><br>- <i>What was the most time-consuming?</i><br>- <i>Would you have liked modules to be more/less time-consuming?</i> |
| 8. The face-to-face contact with my personal coach, aside from the online period, was desirable                       | - <i>Why was this (not) desirable?</i><br><br>- <i>What was the added value?</i>                                                                                            |
| 9. I was satisfied with the goal-setting together with my coach                                                       | - <i>Why where you (not) satisfied</i><br><br>- <i>What could be improved to make it easier?</i>                                                                            |
| 10. The oral explanation of the website was clear to me                                                               | - <i>Points for improvement?</i>                                                                                                                                            |
| 11. The written explanation of the website was clear to me                                                            | - <i>Points for improvement?</i>                                                                                                                                            |
| 12. I was satisfied with the amount of time between modules (1-2 weeks)                                               | - <i>Longer or shorter and why?</i>                                                                                                                                         |
| 13. I was satisfied with the number of modules (4)                                                                    | - <i>More or less and why?</i>                                                                                                                                              |
| 14. I was satisfied with the structure of the modules (video clip, education, self-reflection assignment, 5-stepplan) | - <i>Did it feel natural to follow the steps in this order?</i><br><br>- <i>Why (not)?</i><br><br>- <i>Points for improvement?</i>                                          |
| 15. I made use of:                                                                                                    |                                                                                                                                                                             |
| 15a. The video-clips                                                                                                  | - <i>Why (not)?</i><br><br>- <i>Why did it (not) appeal to you?</i>                                                                                                         |
| 15b. The educational introductions                                                                                    | - <i>Why (not)?</i><br><br>- <i>Why did it (not) appeal to you?</i>                                                                                                         |
| 15c. The self-reflection assignments                                                                                  | - <i>Why (not)?</i><br><br>- <i>Why did it (not) appeal to you?</i>                                                                                                         |
| 15d. The 5-step change plans                                                                                          | - <i>Why (not)?</i>                                                                                                                                                         |

|                                                                                                                       |                                                                                              |
|-----------------------------------------------------------------------------------------------------------------------|----------------------------------------------------------------------------------------------|
|                                                                                                                       | - <i>Why did it (not) appeal to you?</i>                                                     |
| 15e. The discussion forum                                                                                             | - <i>Why (not)?</i><br>- <i>Reading/posting?</i><br>- <i>Why did it (not) appeal to you?</i> |
| 15f. The 'help' button                                                                                                | - <i>Why (not)?</i><br>- <i>Why did it (not) appeal to you?</i>                              |
|                                                                                                                       | <i>Were there components you would omit or add to the program?</i>                           |
| 16. I have experienced privacy issues:                                                                                |                                                                                              |
| 16a. In general                                                                                                       | - <i>What made you feel (un)safe?</i><br>- <i>How could this be improved?</i>                |
| 16b. In communication with my coach                                                                                   | - <i>What made you feel (un)safe?</i><br>- <i>How could this be improved?</i>                |
| 16c. At the discussion forum                                                                                          | - <i>What made you feel (un)safe?</i><br>- <i>How could this be improved?</i>                |
| 17. In general, I am satisfied with the program                                                                       | - <i>Why (not)?</i><br>- <i>Points for improvement?</i>                                      |
| 18. The modules I choose were useful for me                                                                           | - <i>Why (not)?</i><br>- <i>Points for improvement?</i>                                      |
| 19. The content of the modules was interesting                                                                        | - <i>Why (not)?</i><br>- <i>Points for improvement?</i>                                      |
| 20. The tone of the text was appealing to me                                                                          | - <i>Why (not)?</i><br>- <i>Points for improvement?</i>                                      |
| 21. I used the information that was offered in the program in my daily life                                           | - <i>Why (not)?</i><br>- <i>Points for improvement?</i>                                      |
| 22. After following the program, I am more confident that me and my family member can cope with the memory impairment | - <i>Why (not)?</i><br>- <i>Points for improvement?</i>                                      |
| 23. The video clips were a valuable addition to the program                                                           | - <i>Why (not)?</i><br>- <i>Points for improvement?</i>                                      |
| 24. The written introduction was informative and helpful                                                              | - <i>Why (not)?</i><br>- <i>Points for improvement?</i>                                      |
| 25. The self-reflection assignments helped me to carefully review my own situation                                    | - <i>Why (not)?</i><br>- <i>Points for improvement?</i>                                      |
| 26. The 5-step plan helped me to systematically tackle situations that I wished to change                             | - <i>Why (not)?</i><br>- <i>Points for improvement?</i>                                      |
| 27. The discussion forum was a valuable addition to the program                                                       | - <i>Why (not)?</i><br>- <i>Points for improvement?</i>                                      |
|                                                                                                                       | <i>Which aspect(s) of the program were most/least helpful to you?</i>                        |

|                                                                                                     |                                                                                                |
|-----------------------------------------------------------------------------------------------------|------------------------------------------------------------------------------------------------|
| 28. After following the program, I know how to tackle unwanted situations in the future more easily | <i>- Why (not)?</i><br><i>- Points for improvement?</i>                                        |
| 29. I would recommend the program to other family members of people with memory impairment          | <i>- Why (not)?</i><br><i>- What aspects of the program would you recommend in particular?</i> |
| 30. Remaining remarks?                                                                              |                                                                                                |
